# Supplementary material
Source: PubMed Central journal article supplement (PMC3604099)
Supplement: NIHMS450790-supplement-1_si_001.pdf [file NIHMS450790-supplement-1_si_001.pdf]

# **In-Depth Characterization of *N*-Linked Oligosaccharides Using Fluoride-Mediated Negative Ion Microfluidic Chip LC-MS**

Wenqin Ni, Jonathan Bones<sup>‡</sup> and Barry L. Karger\*

Barnett Institute of Chemical and Biological Analysis and Department of Chemistry and  
Chemical Biology, Northeastern University, Boston, MA 02115, USA.

\*To whom correspondence should be addressed: Tel: (617) 373-2867, email: b.karger@neu.edu.

<sup>‡</sup>Present address: NIBRT – The National Institute for Bioprocessing Research and Training, Fosters  
Avenue, Mount Merrion, Blackrock, Co. Dublin, Ireland.

## **SUPPLEMENTAL INFORMATION**

## **Experimental Details:**

### ***Chemicals and reagents***

1,3- $\beta$ -Laminarihexaose and 1,4- $\beta$ -D-cellohexaose were purchased from Megazyme (Bray, Ireland). Galactosylated triantennary (NA3) was purchased from Prozyme (Hayward, CA). The dextran ladder and malto-oligosaccharides, Dp3-7, and all other reagents, including the murine polyclonal antibody, were from Sigma-Aldrich (St. Louis, MO). Standard *N*-glycans were purchased from Prozyme (Hayward, CA), and peptide-*N*-glycosidase F (PNGase F) was from New England Biolabs (Ipswich, MA). LC-MS grade water was obtained from JT Baker (Phillipsburg, NJ) and LC-MS grade acetonitrile from Thermo Fisher Scientific (Fairlawn, NJ). Phytips, packed with 5  $\mu$ L PGC, were a generous gift from PhyNexus (San Jose, CA). Microfluidic chips packed with PGC or for direct infusion were purchased from Agilent Technologies (Waldbronn, Germany).

### ***Reduction of oligasaccharides***

Maltoheptaose (Dp6) or galactosylated triantennary (NA3) was dissolved in 0.1 M sodium borohydride and incubated at 65°C for 1 hour, followed by quenching of the reaction *via* gradual addition of acetic acid. The sample was then purified using PGC packed microextraction Phytips, washed extensively with water, and subsequently eluted with 40% v/v aqueous acetonitrile containing 0.1% trifluoroacetic acid.

### ***Purification of polyclonal human and mouse IgG and N-glycan release***

Polyclonal IgG from human and murine serum (Sigma) were purified by Protein G enrichment in a microplate format (Pierce, Rockford, IL). Following elution and buffer exchange into sodium bicarbonate, pH 7.0, the glycans were enzymatically liberated by PNGase F, using an enzyme to

protein ratio of 1:10 (v/v) at 37°C overnight. Following incubation, the *N*-glycans were collected *via* centrifugation through a 10 kDa molecular weight cut-off filter, reduced to dryness *via* vacuum centrifugation and treated with 1% v/v formic acid to promote conversion of the reducing terminal glycosylamine to the corresponding reducing sugar.

### ***Data analysis and spectral interpretation***

Data analysis was performed on the Agilent MassHunter software B.02.00. Peaks were obtained using extracted ion chromatograms (EIC) generated with a 50 ppm mass accuracy window. The theoretical fragments from each oligosaccharide were automatically calculated by GlycoWorkBench Version 2.1 (Build 132) <sup>1</sup>. For automated annotation, MS/MS spectra were exported from MassHunter as Mascot generic format (.mgf). Mgf files were then loaded into Glycoworkbench as a peak list. Annotation of MS/MS spectra was performed using a combination of automatic searching with GlycoWorkBench in conjunction with manual verification. Annotation of fragment ions was as previously described by Domon and Costello <sup>2</sup>.

**Fig. SI-1:** Annotated ESI negative ion CID-MS/MS analysis of  $[M-H]^-$  ions of infused (A) cellohexasae (glucose- $\beta$ -1-4-glucose), (B) laminarihexasae (glucose- $\beta$ -1-3-glucose) and (C) glucose- $\alpha$ -1,6-glucose hexamer. The collision energy was set at 35 V. Additional details in the Experimental Section of the paper.

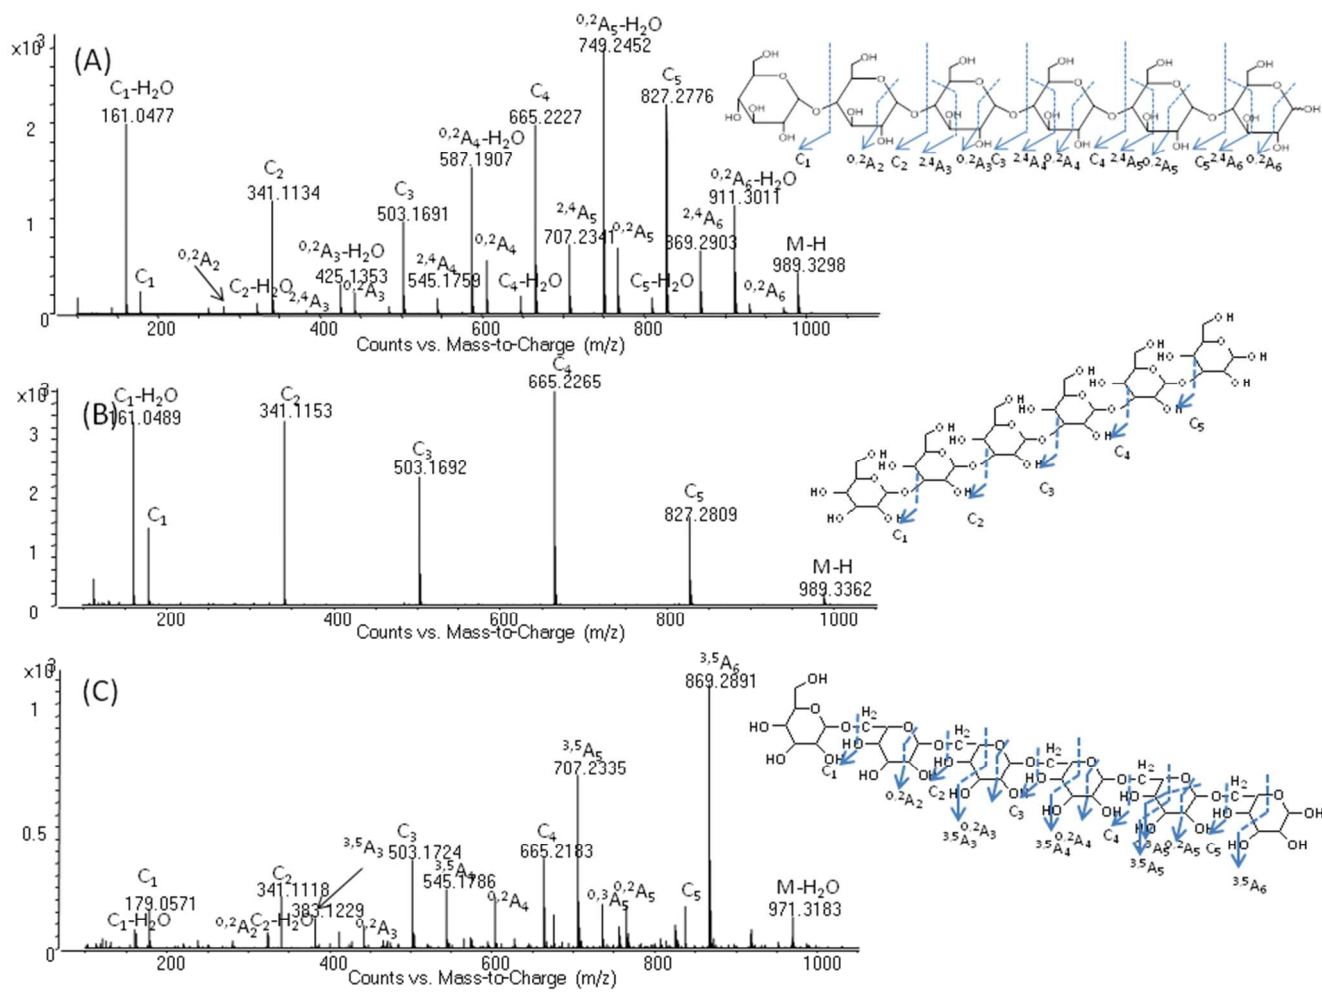

**Fig. SI-2:** Annotated ESI negative ion CID-MS/MS analysis of infused Dp6: (A)  $[2M-H+F]^{2-}$  ion, and (B)  $[M+F]$  ion. The collision energy was set at 35 V. Additional details in the Experimental Section of the paper.

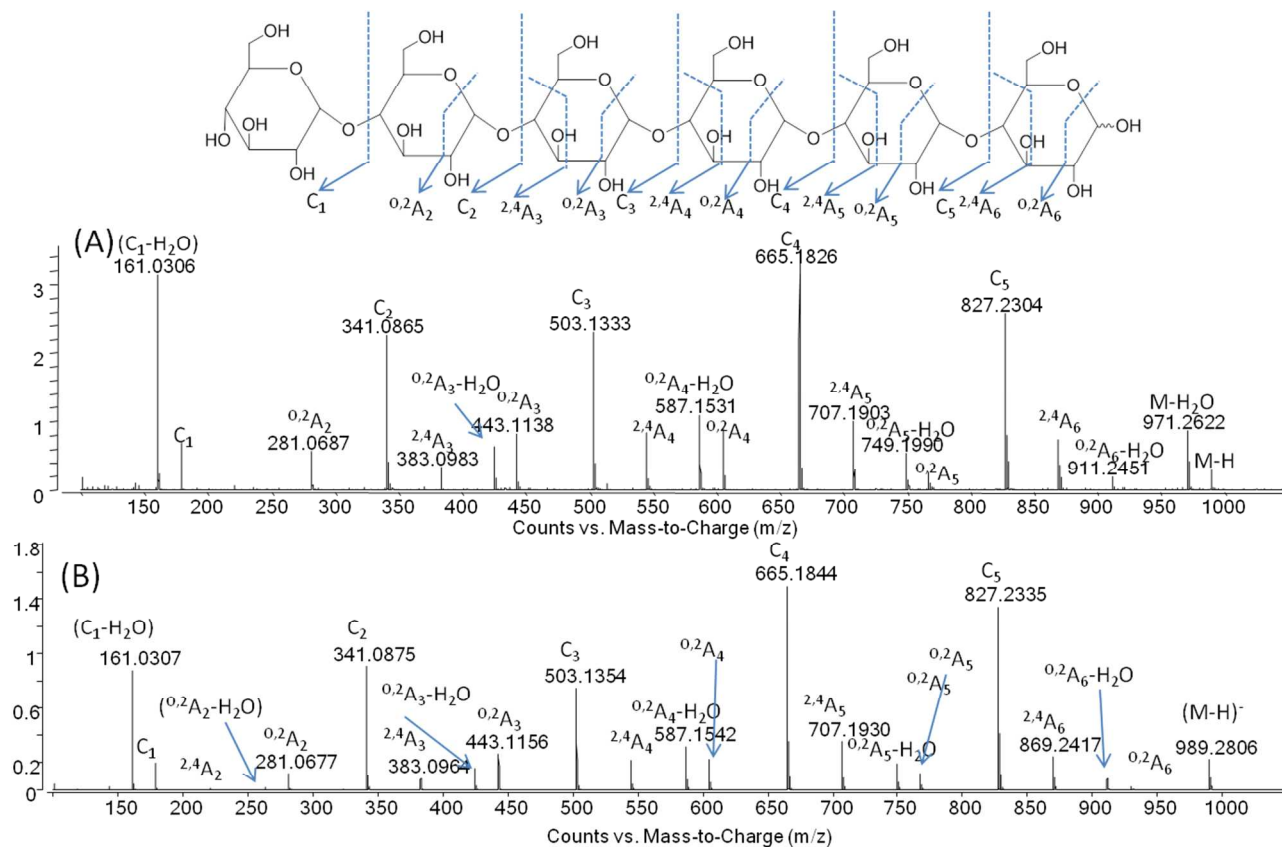

**Table SI-1:** N-linked oligosaccharides identified by fluoride-mediated negative ion chip-LC-MS/MS in the human polyclonal IgG oligosaccharide pool.

| Glycans              | Theoretical m/z <sup>a</sup> | Observed m/z <sup>a</sup> | Retention time (min) <sup>b</sup> |
|----------------------|------------------------------|---------------------------|-----------------------------------|
| FA2                  | 730.2649                     | 730.2677                  | 17.6, 18.9                        |
| A2G[6]1              | 738.2624                     | 738.2668                  | 16.2, 16.6                        |
| FA2G[6]1<br>FA2G[3]1 | 811.2914                     | 811.2956                  | 18.3, 19.6,<br>19.0, 20.3         |
| A2G2                 | 819.2888                     | 819.2951                  | 17.2 <sup>c</sup>                 |
| FA2G2                | 892.3178                     | 892.3225                  | 19.0, 20.2                        |
| FA2BG2               | 993.8575                     | 993.8601                  | 16.4, 17.0                        |
| FA2G2S1              | 1037.8655                    | 1037.8697                 | 20.1, 21.2                        |
| FA2BG2S1             | 1139.4052                    | 1139.4047                 | 18.2, 18.4                        |
| FA2G1S1              | 956.8391                     | 956.8428                  | 19.6, 20.8                        |
| FA2BG1S1             | 1058.3787                    | 1058.3720                 | 17.8 <sup>c</sup>                 |
| FA2G2S2              | 1183.4132                    | 1183.4143                 | 20.8, 21.6                        |
| FA2BG2S2             | 1284.9529                    | 1284.9534                 | 18.8, 19.2                        |

a: The charge in each case was -2.

b: The two retention times represent the anomers.

c: Anomer separation was not observed.

**Table SI-2:** N-linked oligosaccharides identified by fluoride-mediated negative ion chip-LC-MS/MS in the murine polyclonal IgG oligosaccharide pool.

| Glycans                       | Theoretical m/z <sup>a</sup> | Observed m/z <sup>a</sup> | Retention time (min) <sup>b</sup> |
|-------------------------------|------------------------------|---------------------------|-----------------------------------|
| FA2G[3]1S(Neu5Gc)1            | 964.8635                     | 964.8633                  | 19.1, 19.6                        |
| FA2G2Gal [6]1                 | 973.3442                     | 973.3735                  | 20.7, 21.5                        |
| FA2G2S[6]1 (Neu5Gc)           | 1045.8629                    | 1045.8921                 | 20.1, 21.3                        |
| FA2G2S[3]1 (Neu5Gc)           | 1045.8629                    | 1055.8898                 | 23.8 <sup>c</sup>                 |
| FA1G[3]1S1 (Neu5Gc)           | 863.2968                     | 863.3217                  | 19.7, 21.1                        |
| FA2G2S1                       | 1037.8655                    | 1037.8898                 | 20.1, 21.4                        |
| FA2G2S2 (Neu5Gc)              | 1199.4081                    | 1199.4412                 | 20.7, 22.0                        |
| FA2G2S2                       | 1183.4132                    | 1183.4475                 | 21.1, 22.2                        |
| FA2                           | 730.2649                     | 730.2851                  | 17.5, 18.8                        |
| FA2G[6]1, FA2G[3]1            | 811.2914                     | 811.3140                  | 18.1, 19.4                        |
| FA2G2                         | 892.3178                     | 892.3423                  | 18.9, 20.2                        |
| FA2G2Gal2                     | 1054.3706                    | 1054.3965                 | 22.8 <sup>c</sup>                 |
| FA2G2Gal[6]1S[3]1<br>(Neu5Gc) | 1126.8893                    | 1126.8860                 | 21.3, 22.4                        |

a: The charge in each case was -2.

b: The two retention times represent the anomers.

c: Anomer separation was not observed.

#### References:

- 1 Ceroni, A.; Maass, K.; Geyer, H.; Geyer, R.; Dell, A.; Haslam, S. M. *J Proteome Res.* **2008**, *7*, 1650-1659.
- 2 Domon, B.; Costello, C. E. *Glycoconjugate Journal.* **1988**, *5*, 397-409.
